# Supplementary material for: Pure room temperature phosphorescence emission of an organic host–guest doped system with a quantum efficiency of 64%
Source: Royal Society of Chemistry journal article supplement (doi:10.1039/d1tc00403d), 2021-01-01
Supplement: d1tc00403d1.pdf [file d1tc00403d1.pdf]

## Electronic Supplementary Information

### **Pure room temperature phosphorescence emission of organic host-guest doped system with quantum efficiency of 64%**

Xiaoqing Liu,<sup>‡a</sup> Wenbo Dai,<sup>‡b</sup> Junjie Qian,<sup>a</sup> Yunxiang Lei,<sup>\*a</sup> Miaochang Liu,<sup>a</sup> Zhengxu Cai,<sup>\*b</sup> Xiaobo Huang,<sup>\*a</sup> Huayue Wu<sup>a</sup> and Yuping Dong<sup>b</sup>

<sup>a</sup> School of Chemistry and Materials Engineering, Wenzhou University, Wenzhou 325035 (P. R. China)

<sup>b</sup> School of Materials Science & Engineering, Beijing Institute of Technology, Beijing, 10081 (P. R. China)

E-mail: yunxianglei@wzu.edu.cn (Y. Lei); caizx@bit.edu.cn (Z. Cai); xiaobhuang@wzu.edu.cn (X. Huang)

<sup>‡</sup> These authors contributed equally to this work

## Contents:

### 1. Experimental

#### 1.1 Measurements and materials

NMR spectra were determined on a Bruker DRX 500 NMR spectrometer using deuterated chloroform and dimethyl sulfoxide as a solvent and trimethylsilane as a reference. UV-vis absorption spectra were performed with a UV-3600 Shimadzu spectrophotometer. Fluorescence spectra were performed with a HITACHI F-7000 fluorometer. Phosphorescence spectra were measured by using FLS920 lifetime and steady state spectrometer. Solid-state emission quantum yields were collected by using FluoroMax-4 (Horiba Jobin Yvon) fluorimeter equipped with integrated sphere. The X-ray crystallographic analyses were conducted on a Bruker SMART II CCD area detector. The theoretical ground-state geometry and electronic structure were performed using the density functional theory (DFT) with B3LYP hybrid functional at the basis set level of 6-31+G (d, p). (4-(Diphenylamino)phenyl)boronic acid, 2-phenylacetonitrile, 2-(4-fluorophenyl)acetonitrile, 2-(4-chlorophenyl)acetonitrile, 2-(4-bromophenyl)acetonitrile, and Ni(dppe)Cl<sub>2</sub> were obtained from the commercial suppliers. The 1-(4-(diphenylamino)phenyl)-2-phenylethan-1-one derivatives were synthesized by a similar synthetic method according to the previous literature.<sup>1</sup>

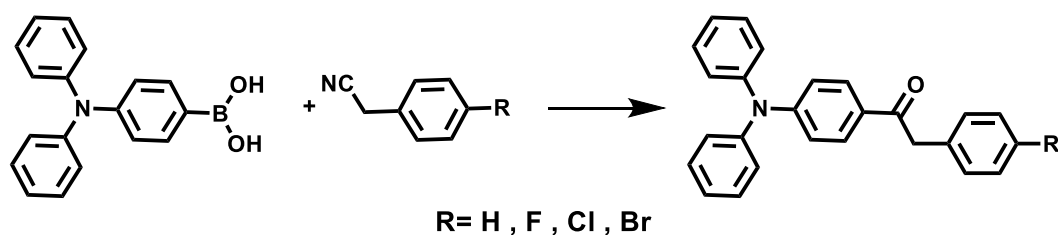

**Scheme S1** Synthetic routes of the four guest molecules.

#### 1.2 General procedure for the synthesis of the guest molecules

A mixture of (4-(diphenylamino)phenyl)boronic acid (20 mmol), the corresponding phenylacetonitrile derivative (10 mmol), Ni(dppe)Cl<sub>2</sub> (5.0 mol%), ZnCl<sub>2</sub> (15.0 mmol), H<sub>2</sub>O (10.0 mL), and 1,4-dioxane (20.0 mL) was stirred at 80 °C for 8 h under nitrogen atmosphere. After the reaction solution was cooled to room temperature, Ni(dppe)Cl<sub>2</sub> was filtered. After the removal of solvent under reduced pressure, the crude products were purified by column chromatography (petroleum ether/ethyl acetate) to afford the pure 1-(4-(diphenylamino)phenyl)-2-phenylethan-1-one derivative. Characterization data of the target compounds are listed as follows.

**1-(4-(Diphenylamino)phenyl)-2-phenylethan-1-one (PAPO-H).** White solid, 68% yield. <sup>1</sup>H NMR (500 MHz, CDCl<sub>3</sub>): δ 4.20 (s, 2H), 6.97 (d, *J* = 8.0 Hz, 2H), 7.15 (d, *J* = 7.6 Hz, 6H), 7.24 (s, 1H), 7.30-7.34 (m, 8H), 7.86 (d, *J* = 8.0 Hz, 2H) ppm. <sup>13</sup>C NMR (125 MHz, CDCl<sub>3</sub>): δ 195.9, 152.2, 146.4, 135.3, 130.3, 129.7, 129.4, 129.0, 128.6, 126.7, 126.1, 124.8, 119.5, 45.2 ppm.

**1-(4-(Diphenylamino)phenyl)-2-(4-fluorophenyl)ethan-1-one (PAPO-F).** White solid, 72% yield. <sup>1</sup>H

NMR (500 MHz, DMSO-*d*<sub>6</sub>):  $\delta$  4.26 (s, 2H), 6.86 (d, *J* = 8.5 Hz, 2H), 7.11-7.21 (m, 8H), 7.26-7.29 (m, 2H), 7.40 (t, *J* = 7.5 Hz, 4H), 7.91 (d, *J* = 8.5 Hz, 2H) ppm. <sup>13</sup>C NMR (125 MHz, CDCl<sub>3</sub>):  $\delta$  195.6, 162.8, 160.9, 152.3, 146.4, 131.0, 130.9, 130.8, 130.2, 129.7, 128.7, 126.1, 124.9, 119.4, 115.5, 115.4, 44.2 ppm.

**2-(4-Chlorophenyl)-1-(4-(diphenylamino)phenyl)ethan-1-one (PAPO-Cl).** White solid, 70% yield. <sup>1</sup>H NMR (500 MHz, DMSO-*d*<sub>6</sub>):  $\delta$  4.27 (s, 2H), 6.86 (d, *J* = 8.5 Hz, 2H), 7.15-7.21 (m, 6H), 7.27 (d, *J* = 8.0 Hz, 2H), 7.35-7.41 (m, 6H), 7.90 (d, *J* = 8.5 Hz, 2H) ppm. <sup>13</sup>C NMR (125 MHz, CDCl<sub>3</sub>):  $\delta$  195.2, 125.4, 146.4, 133.7, 132.7, 130.8, 130.2, 129.7, 128.7, 126.2, 124.9, 119.4, 44.3 ppm.

**2-(4-Bromophenyl)-1-(4-(diphenylamino)phenyl)ethan-1-one (PAPO-Br).** White solid, 75% yield. <sup>1</sup>H NMR (500 MHz, DMSO-*d*<sub>6</sub>):  $\delta$  4.26 (s, 2H), 6.85 (d, *J* = 9.0 Hz, 2H), 7.15-7.22 (m, 8H), 7.40 (t, *J* = 8.0 Hz, 4H), 7.49 (d, *J* = 8.5 Hz, 2H), 7.90 (d, *J* = 9.0 Hz, 2H), ppm. <sup>13</sup>C NMR (125 MHz, CDCl<sub>3</sub>):  $\delta$  195.2, 152.4, 146.3, 134.2, 131.7, 131.2, 130.2, 129.6, 128.6, 126.2, 124.9, 120.8, 119.4, 44.4, ppm.

## References:

1. Y. C. Wong, K. Parthasarathy, and C. H. Cheng. *Org. Lett.*, 2010, **12**, 1736-1739.

## 2. Figures and tables

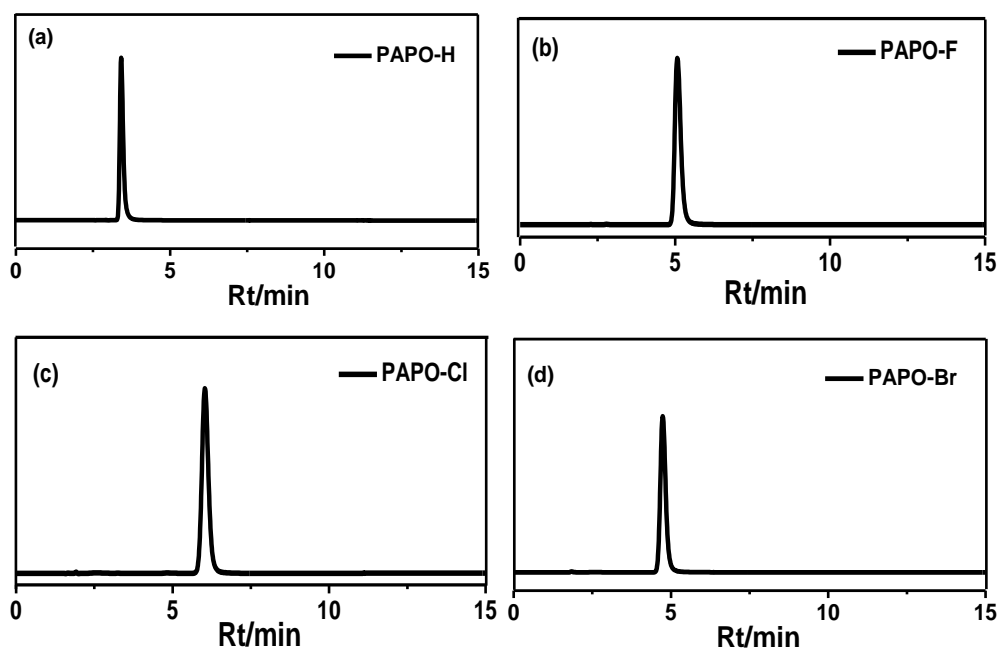

**Figure S1.** High performance liquid chromatography of PAPO-H (a), PAPO-F (b), PAPO-Cl (c), PAPO-Br (d). (CH<sub>3</sub>OH/H<sub>2</sub>O= 80%: 20%)

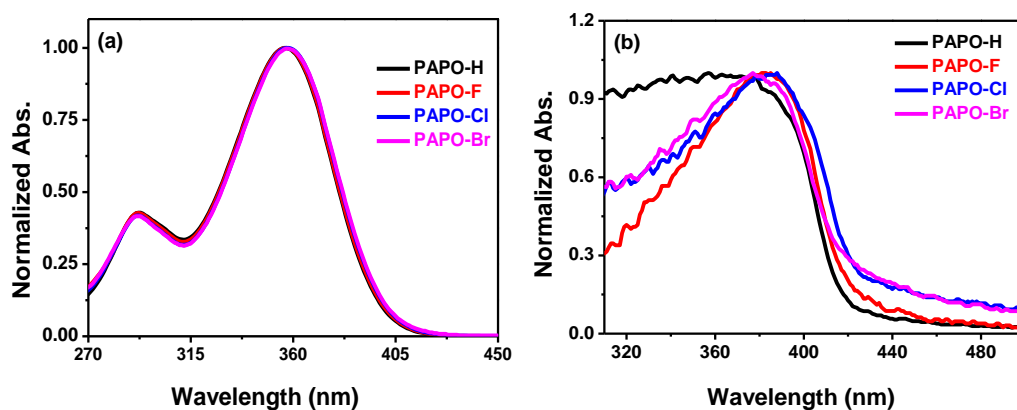

**Fig. S2** (a) Normalized absorption spectra of the guests in THF solvent. Concentration:  $1.0 \times 10^{-5}$  mol/L. (b) Normalized absorption spectra of the guests in solid state.

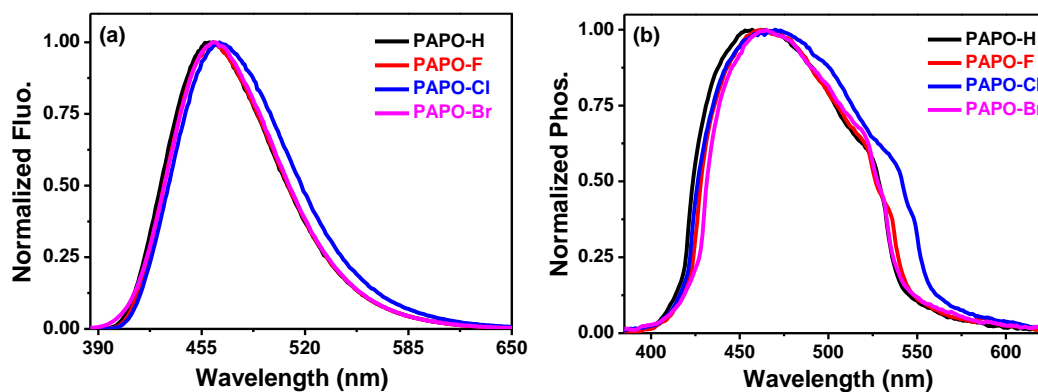

**Fig. S3** (a) Normalized prompt emission spectra of the guests in THF solvent. Concentration:  $1.0 \times 10^{-5}$  mol/L. (b) Normalized delayed emission spectra of the guests in THF solvent. Concentration:  $1.0 \times 10^{-5}$  mol/L. Delayed time: 0.5 ms.

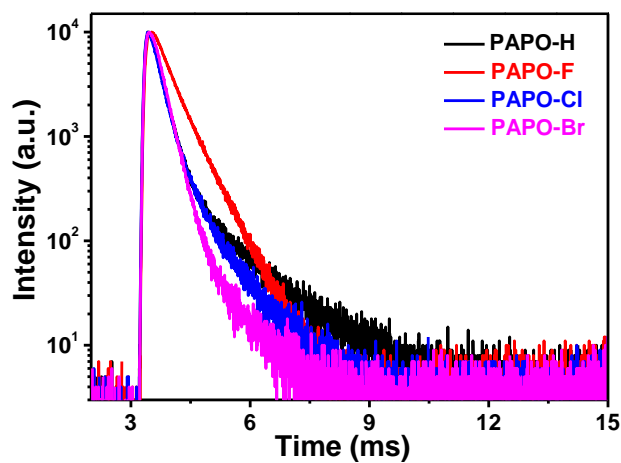

**Fig. S4** Phosphorescence decay curves of four doped materials in solution state at 470 nm.

**Table 1** Photophysical properties of the guest molecules.

| Sample   | $\lambda_{em}$<br>(nm)             | Fluo.                                |                  | $\lambda_{em}$<br>(nm)             | Phos.                               |                                   |
|----------|------------------------------------|--------------------------------------|------------------|------------------------------------|-------------------------------------|-----------------------------------|
|          |                                    | QY<br>(%)                            | $\tau$<br>(ns)   |                                    | QY<br>(%)                           | $\tau$<br>(ms)                    |
| IPAPO-H  | 430 <sup>a</sup> /463 <sup>b</sup> | 61.5 <sup>a</sup> /44.3 <sup>b</sup> | 2.3 <sup>b</sup> | 570 <sup>a</sup> /470 <sup>b</sup> | 6.5 <sup>a</sup> /2.0 <sup>b</sup>  | 32 <sup>a</sup> /2.3 <sup>b</sup> |
| IPAPO-F  | 432 <sup>a</sup> /462 <sup>b</sup> | 65.3 <sup>a</sup> /49.6 <sup>b</sup> | 3.1 <sup>b</sup> | 572 <sup>a</sup> /471 <sup>b</sup> | 6.3 <sup>a</sup> /1.6 <sup>b</sup>  | 27 <sup>a</sup> /4.6 <sup>b</sup> |
| IPAPO-Cl | 431 <sup>a</sup> /464 <sup>b</sup> | 67.5 <sup>a</sup> /42.8 <sup>b</sup> | 2.4 <sup>b</sup> | 570 <sup>a</sup> /472 <sup>b</sup> | 9.1 <sup>a</sup> /1.8 <sup>b</sup>  | 35 <sup>a</sup> /3.8 <sup>b</sup> |
| IPAPO-Br | 430 <sup>a</sup> /463 <sup>b</sup> | 64.2 <sup>a</sup> /47.2 <sup>b</sup> | 3.7 <sup>b</sup> | 570 <sup>a</sup> /473 <sup>b</sup> | 13.2 <sup>a</sup> /2.2 <sup>b</sup> | 31 <sup>a</sup> /5.2 <sup>b</sup> |

<sup>a</sup> In the solid state. <sup>b</sup> In the solution state.

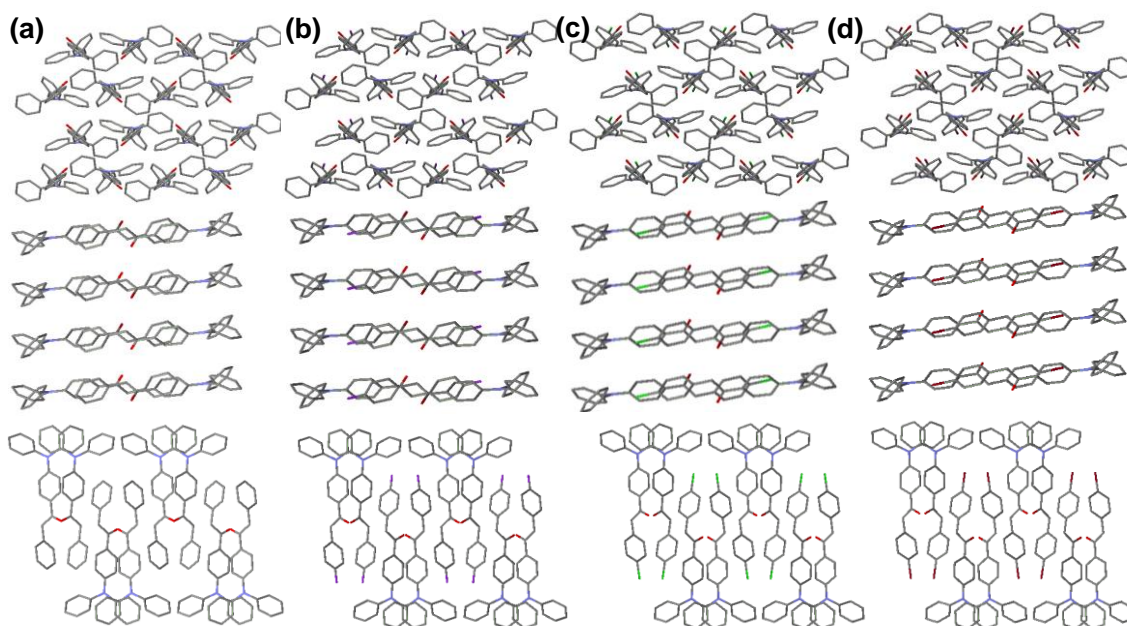

**Fig. S5** Stacking arrangements of PAPO-H (a), PAPO-F (b), PAPO-Cl (c) and PAPO-Br (d) along *a*-axis (top), *b*-axis (middle), and *c*-axis (bottom).

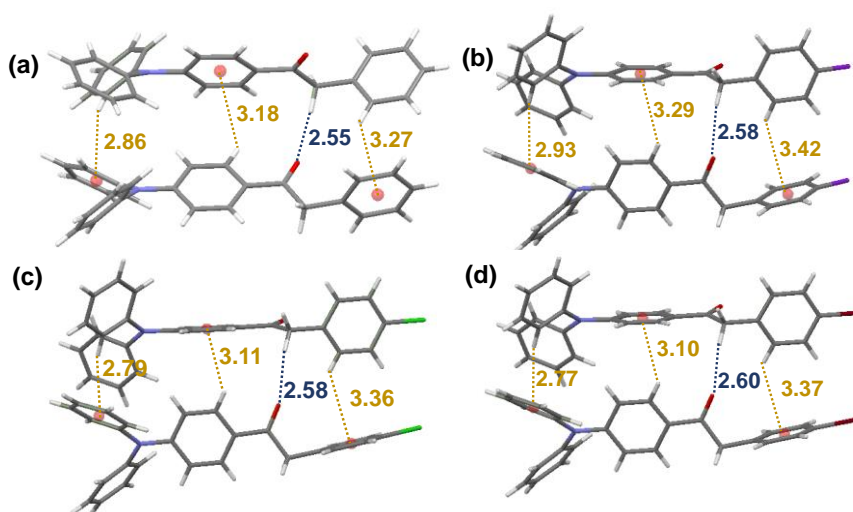

**Fig. S6** Intramolecular interactions of **PAPO-H** (a), **PAPO-F** (b), **PAPO-Cl** (c) and **PAPO-Br** (d). (Orange line: C-H $\cdots\pi$ , blue line: C-H $\cdots$ O).

**Table 2** Crystal data and details of collection and refinement for the guest molecules.

|                                                             | <b>PAPO-H</b>                      | <b>PAPO-F</b>                       | <b>PAPO-Cl</b>                       | <b>PAPO-Br</b>                       |
|-------------------------------------------------------------|------------------------------------|-------------------------------------|--------------------------------------|--------------------------------------|
| CCDC                                                        | 2055990                            | 2055992                             | 2055994                              | 2056001                              |
| Empirical formula                                           | C <sub>26</sub> H <sub>21</sub> NO | C <sub>26</sub> H <sub>20</sub> FNO | C <sub>26</sub> H <sub>20</sub> ClNO | C <sub>26</sub> H <sub>20</sub> BrNO |
| Formula weight                                              | 363.44                             | 381.43                              | 397.88                               | 442.34                               |
| Temperature (K)                                             | 153.15                             | 293(2)                              | 153.15                               | 153.15                               |
| Crystal system                                              | Monoclinic                         | Monoclinic                          | Monoclinic                           | Monoclinic                           |
| Space group                                                 | <i>P</i> 2(1)/ <i>c</i>            | <i>P</i> 2(1)/ <i>c</i>             | <i>P</i> 2(1)/ <i>c</i>              | <i>P</i> 2(1)/ <i>c</i>              |
| <i>Z</i>                                                    | 4                                  | 4                                   | 4                                    | 4                                    |
| <i>D</i> <sub>calcd</sub> [Mg/m <sup>3</sup> ]              | 1.246                              | 1.251                               | 1.307                                | 1.439                                |
| <i>F</i> (000)                                              | 768.0                              | 800                                 | 832.0                                | 904.0                                |
| $\theta$ range [°]                                          | 5.848-54.96                        | 3.012-24.997                        | 5.468-54.974                         | 5.402-54.92                          |
| <i>R</i> <sub>1</sub> [ <i>I</i> >2 $\sigma$ ( <i>I</i> )]  | 0.0668                             | 0.0921                              | 0.0666                               | 0.0618                               |
| <i>wR</i> <sub>2</sub> [ <i>I</i> >2 $\sigma$ ( <i>I</i> )] | 0.1256                             | 0.2363                              | 0.1287                               | 0.1072                               |
| <i>a</i> [Å]                                                | 20.928(4)                          | 21.548(2)                           | 22.361(5)                            | 22.628(5)                            |
| <i>b</i> [Å]                                                | 10.831(2)                          | 10.8853(11)                         | 10.757(2)                            | 10.750(2)                            |
| <i>c</i> [Å]                                                | 8.5628(17)                         | 8.6636(9)                           | 8.4111(17)                           | 8.3962(17)                           |
| $\alpha$ [deg]                                              | 90                                 | 90                                  | 90                                   | 90                                   |
| $\beta$ [deg]                                               | 93.09(3)                           | 94.981(4)                           | 92.09(3)                             | 91.56(3)                             |
| $\gamma$ [deg]                                              | 90                                 | 90                                  | 90                                   | 90                                   |
| <i>V</i> [Å <sup>3</sup> ]                                  | 1938.1(7)                          | 2024.4(4)                           | 2021.9(7)                            | 2041.7(7)                            |
| GOF                                                         | 1.144                              | 1.009                               | 1.175                                | 1.155                                |
| <i>R</i> (int)                                              | 0.0421                             | 0.0821                              | 0.0392                               | 0.0460                               |
| No. of reflens collect                                      | 12863                              | 8516                                | 13279                                | 13536                                |
| No. of unique reflens                                       | 4352                               | 3526                                | 4564                                 | 4644                                 |
| <i>R</i> <sub>1</sub> (all data)                            | 0.0794                             | 0.1608                              | 0.0766                               | 0.0774                               |
| <i>wR</i> <sub>2</sub> (all data)                           | 0.1322                             | 0.2919                              | 0.1340                               | 0.1139                               |

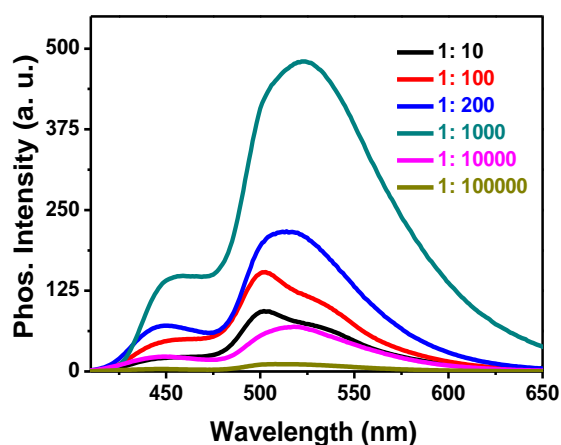

Fig. S7 Delayed emission spectra of the PAPO-Br/BPO doped materials with different amounts of PAPO-Br (Molar ratio). (Ex. = 380 nm)

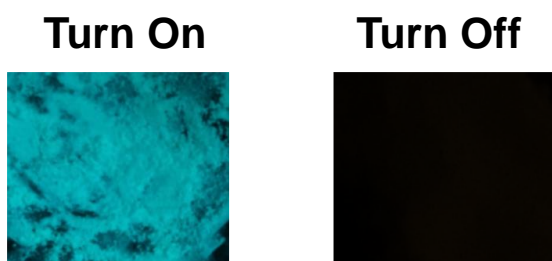

Fig. S8 Luminous pictures of host under different conditions.

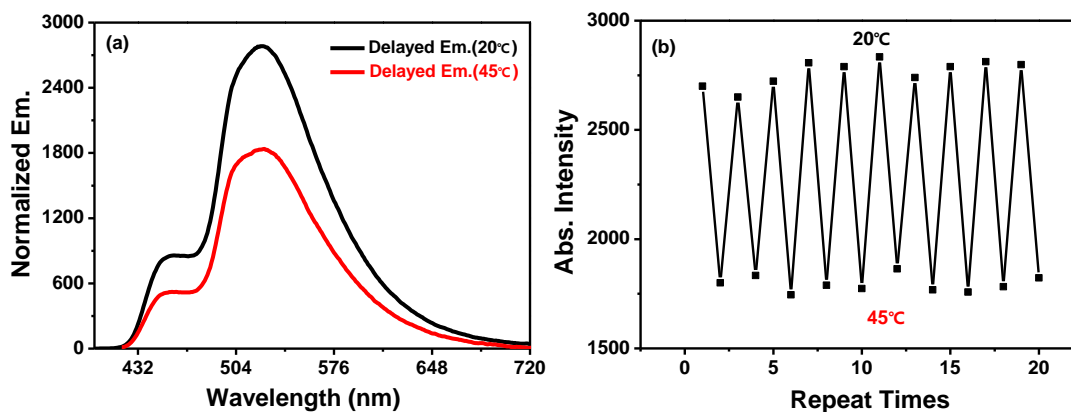

Fig. S9. (a) Delayed spectra of PAPO-Br/BPO at different temperatures. (b) Recycling of the heating process of PAPO-Br/BPO (emission peak intensity).

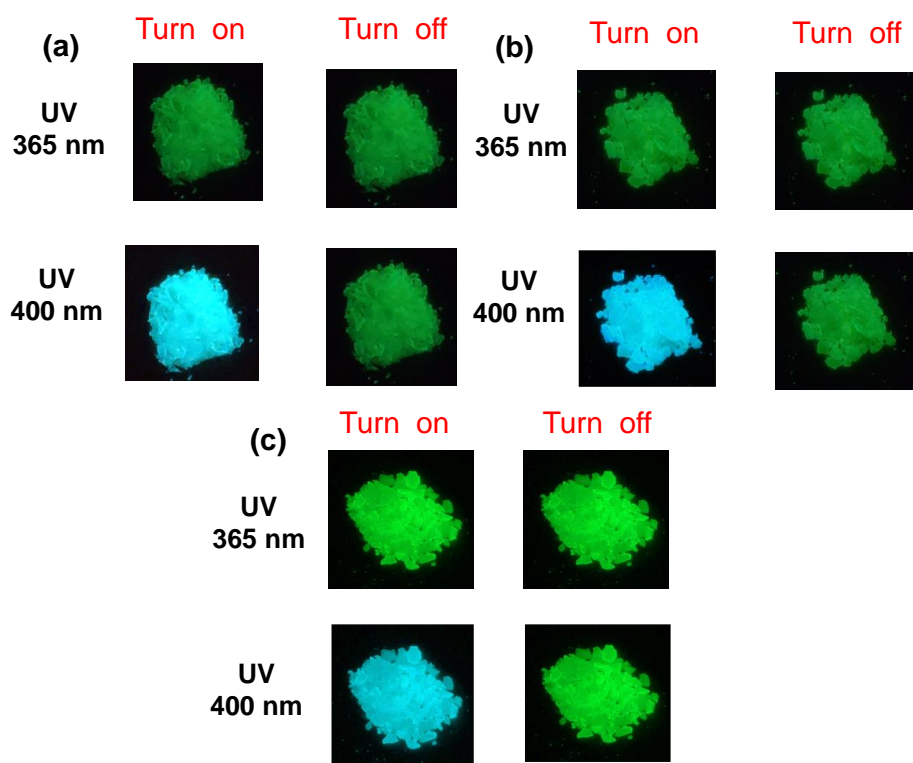

**Fig. S10** Luminous pictures of PAPO-H/BPO (a), PAPO-F/BPO (b), and PAPO-Cl/BPO (c) under different conditions.

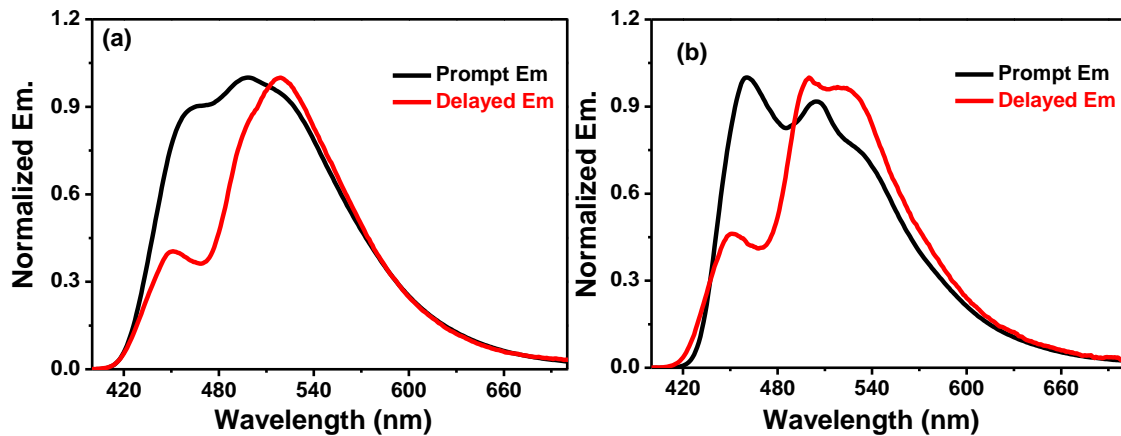



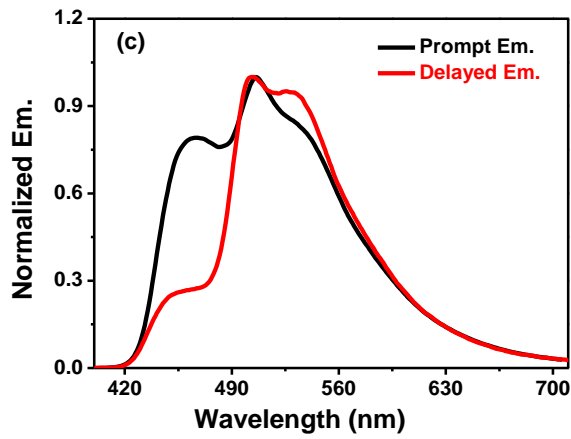

Fig. S11 Emission spectra of PAPO-H/BPO (a), PAPO-F/BPO (b), PAPO-CI/BPO (c) under 365 nm excitation wavelength.

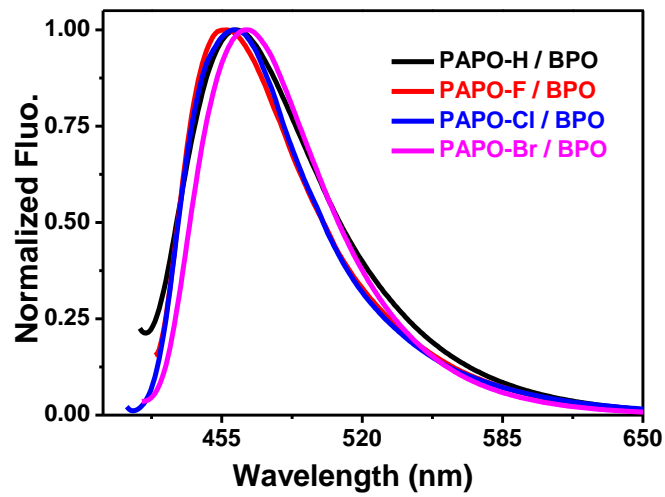

Fig. S12 Prompt emission spectra of the doped materials under 400 nm excitation wavelength.

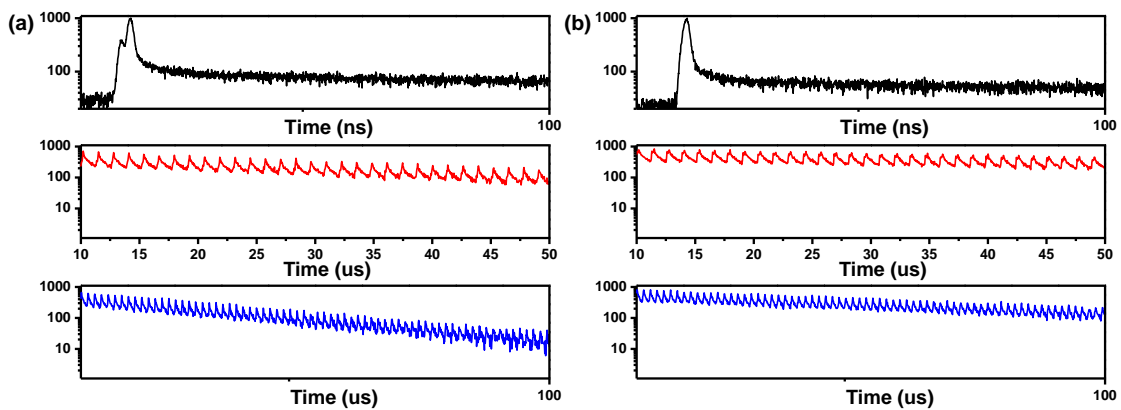

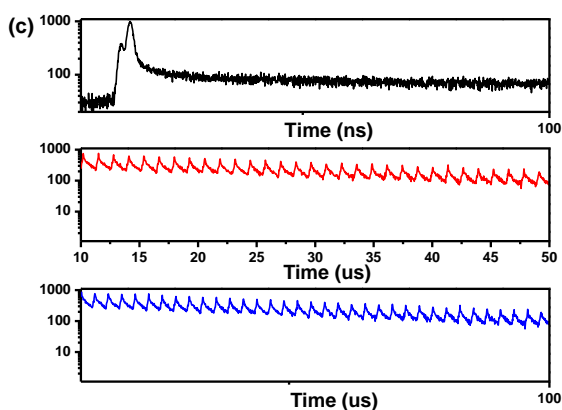

Fig. S13 Time-resolved prompt emission decay curves of PAPO-H/BPO (a), PAPO-F/BPO (b), and PAPO-CI/BPO (c) in different decay range.

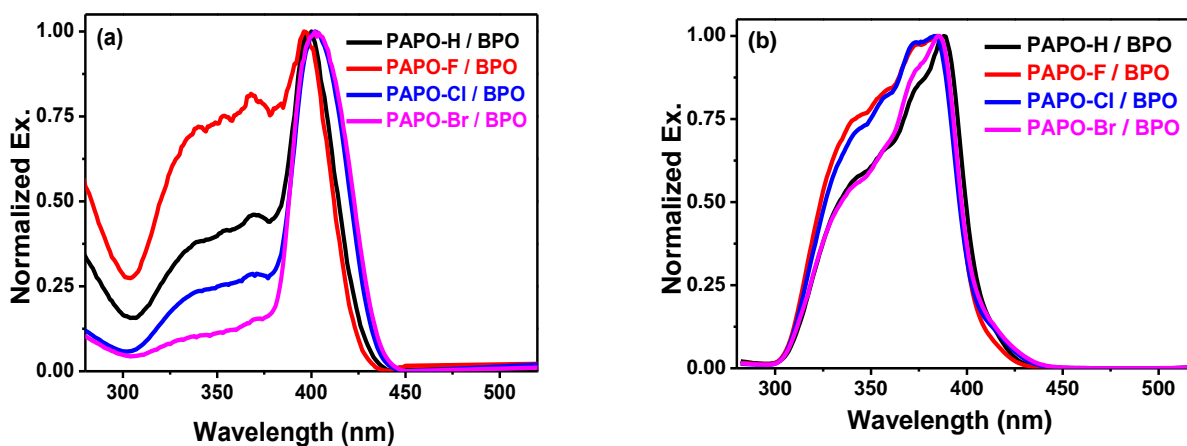

Fig. S14 (a) The excitation spectra of fluorescence of the doped materials. (b) The excitation spectra of phosphorescence of the doped materials.

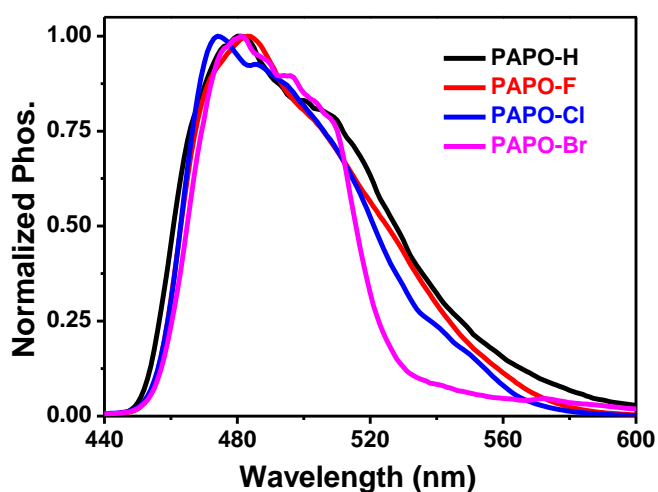

Fig. S15 Phosphorescence emission spectra of four guests in the solution state (Concentration:  $1.0 \times 10^{-5}$  mol/L, 77K).

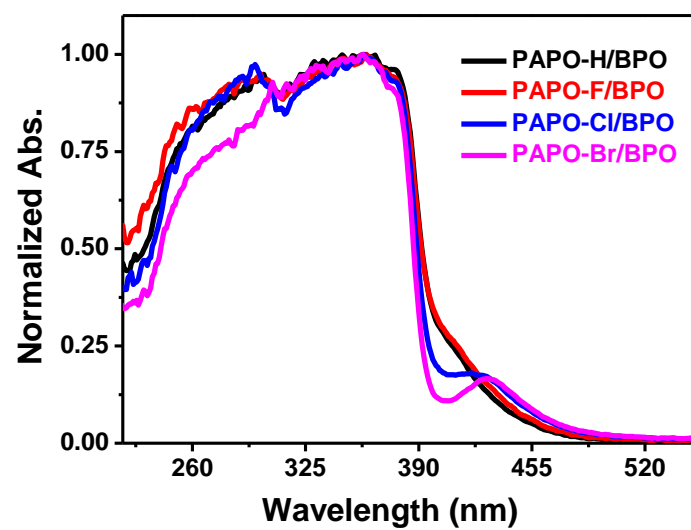

**Fig. S16** UV-visible absorption spectra of the doped materials under 400 nm excitation wavelength.

### 3. NMR Spectra

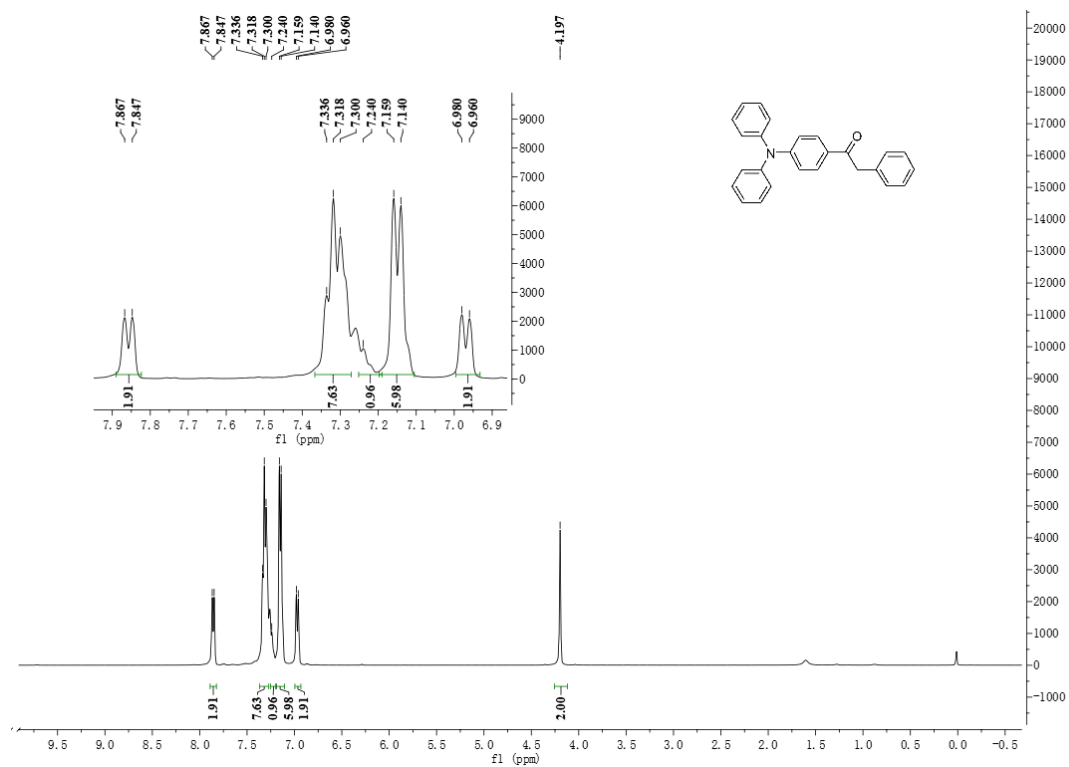

Fig. S17 <sup>1</sup>H NMR of PAPO-H (CDCl<sub>3</sub>, 500 MHz).

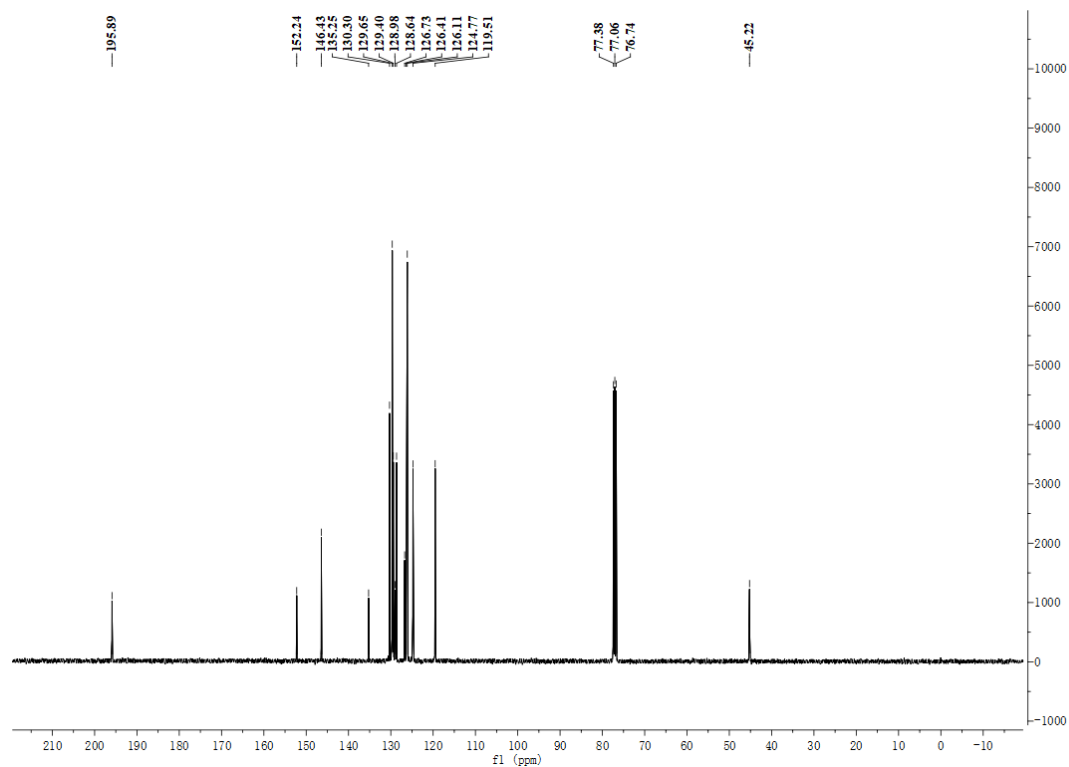

Fig. S18 <sup>13</sup>C NMR of PAPO-H (CDCl<sub>3</sub>, 125 MHz).

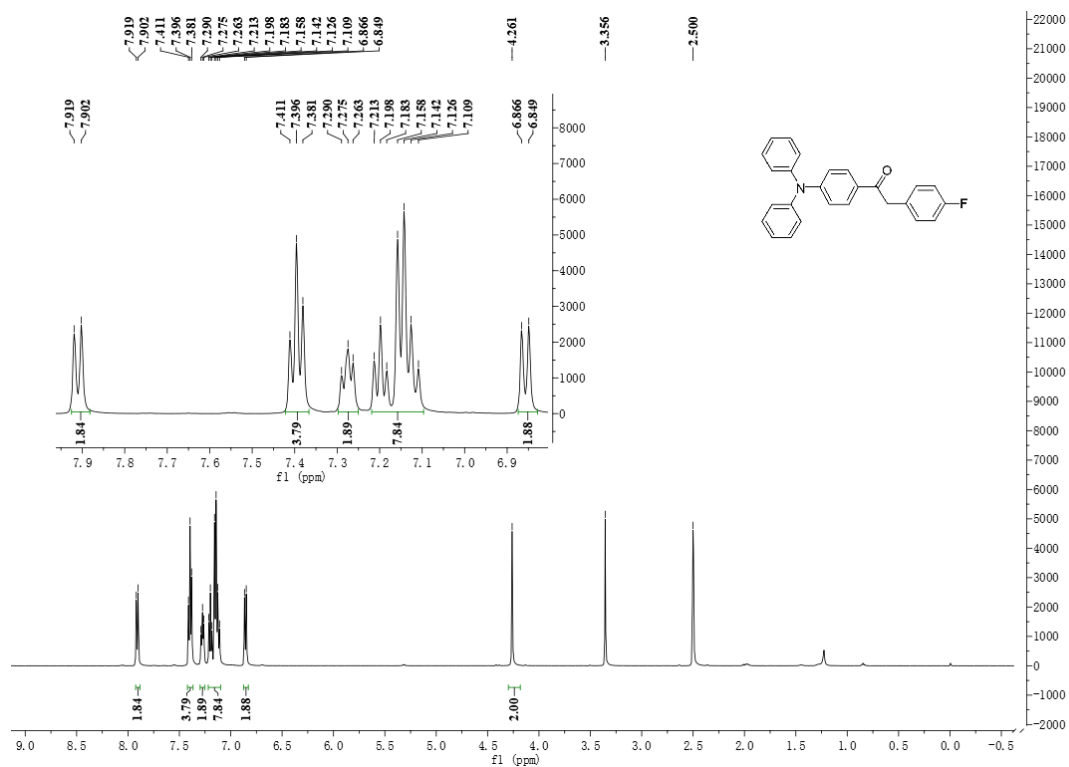

Fig. S19 <sup>1</sup>H NMR of PAPO-F (DMSO-*d*<sub>6</sub>, 500 MHz).

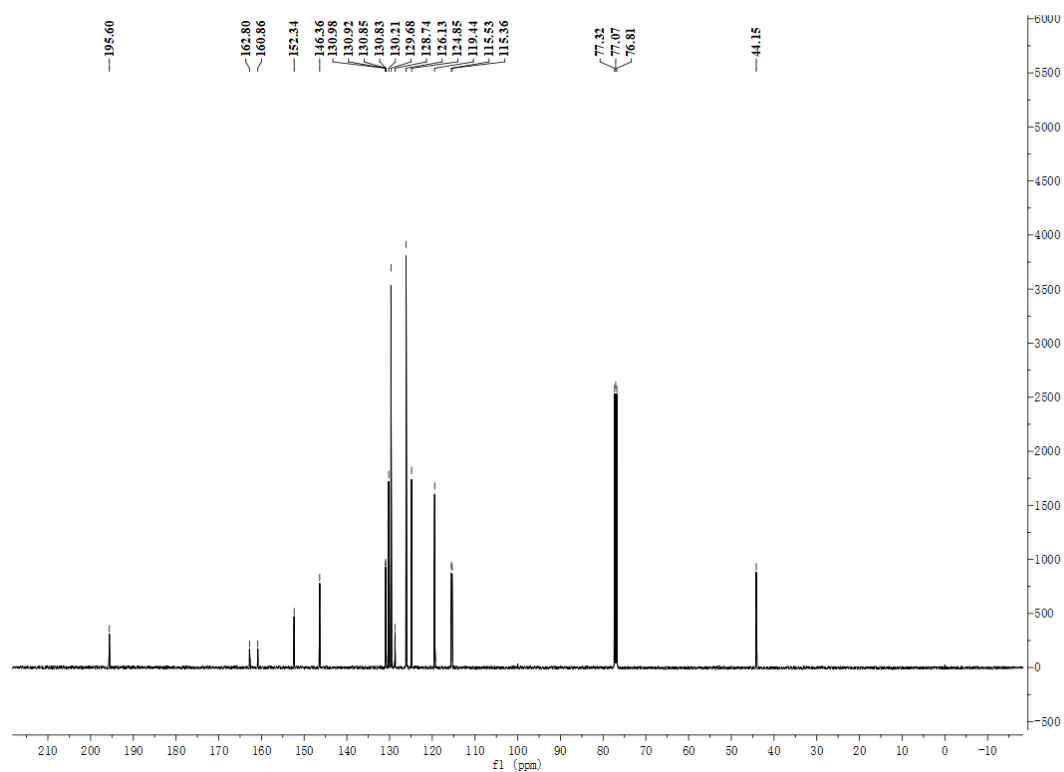

Fig. S20 <sup>13</sup>C NMR of PAPO-F (CDCl<sub>3</sub>, 125 MHz).

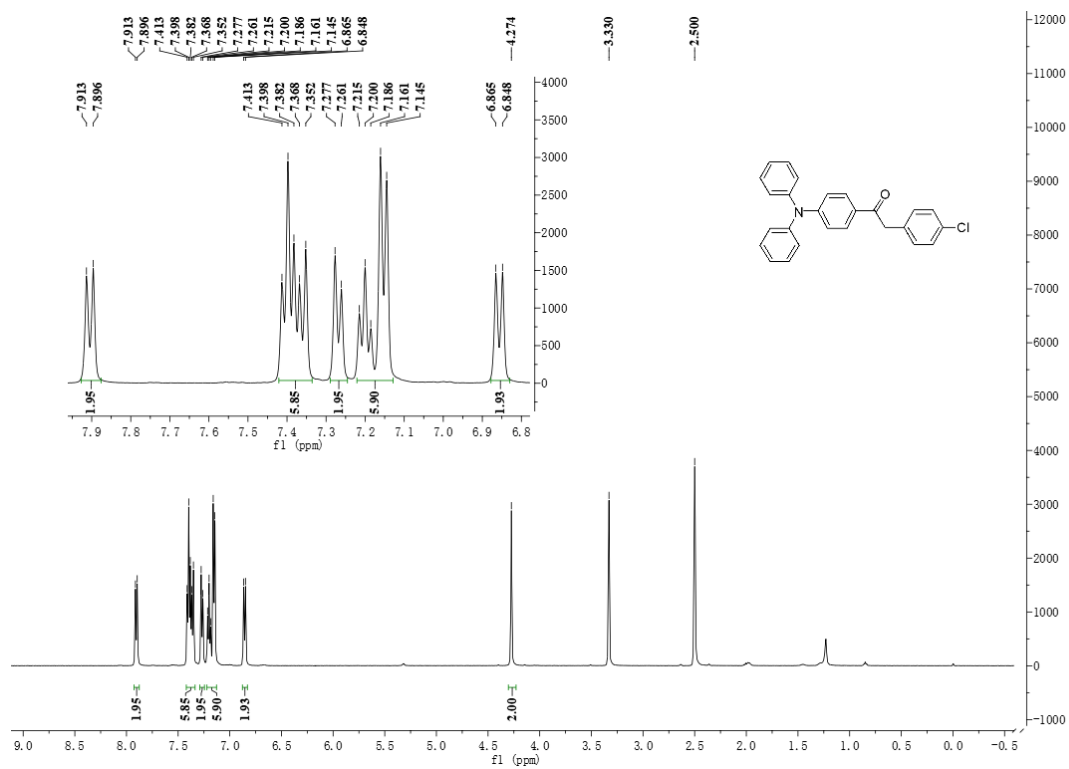

Fig. S21 <sup>1</sup>H NMR of PAPO-Cl (DMSO-*d*<sub>6</sub>, 500 MHz).

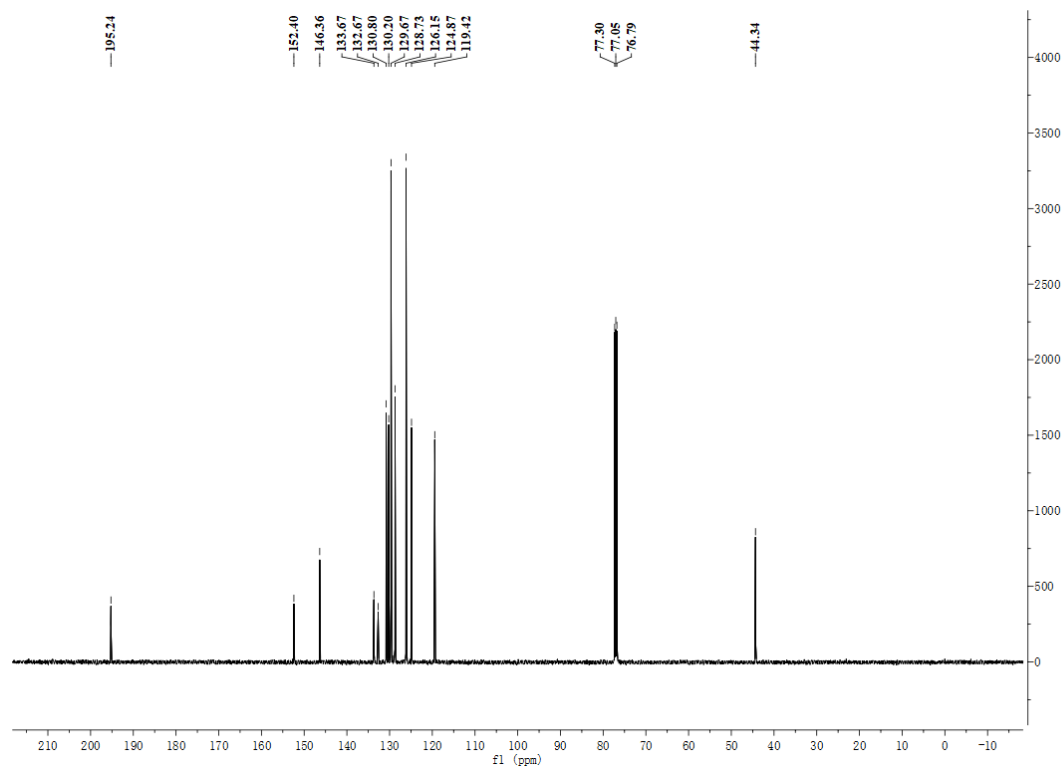

Fig. S22 <sup>13</sup>C NMR of PAPO-Cl (CDCl<sub>3</sub>, 125 MHz).

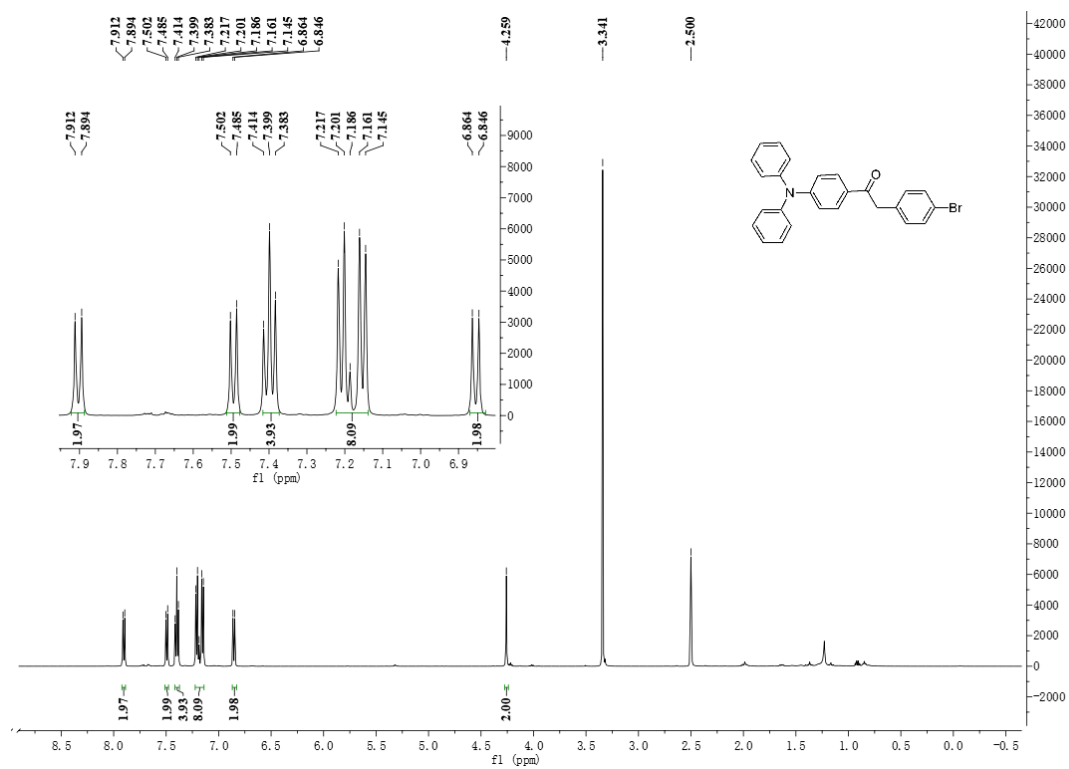

Fig. S23  $^1\text{H}$  NMR of PAPO-Br ( $\text{DMSO-}d_6$ , 500 MHz).

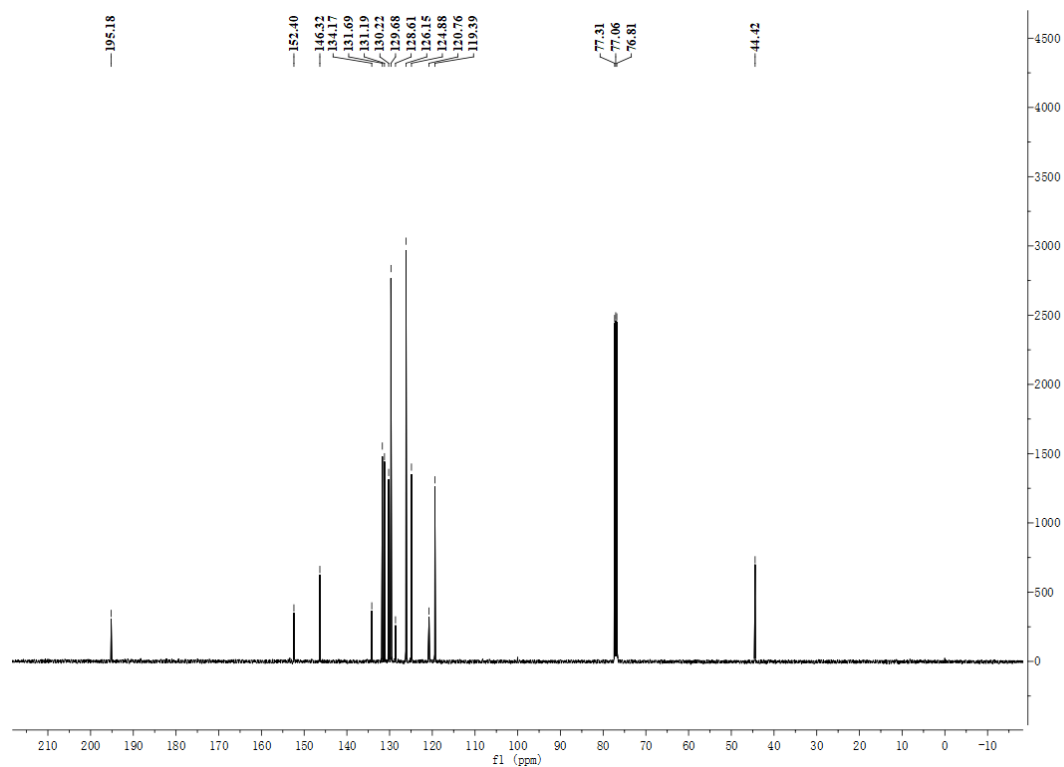

Fig. S24  $^{13}\text{C}$  NMR of PAPO-Br ( $\text{CDCl}_3$ , 125 MHz).
